

# JobCentral

The Career Hub  
for Psychiatry

## Manage Your Career

- Browse thousands of active job listings!
- Create an account to save jobs, store multiple resumes and cover letters and communicate with employers through our internal messaging system.
- Set up multiple job alerts specifying your skills, interests and location to receive e-mails when employers post jobs that match your criteria.

## Recruit for Open Positions

- Post your job in front of thousands of highly qualified psychiatrists.
- Cross promote your job listing in Psychiatric News.
- Search the anonymous resume database to find your ideal candidate.

AMERICAN  
PSYCHIATRIC  
ASSOCIATION

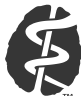

**JOBCENTRAL**  
The Career Hub for

[jobs.psychiatry.org](http://jobs.psychiatry.org)

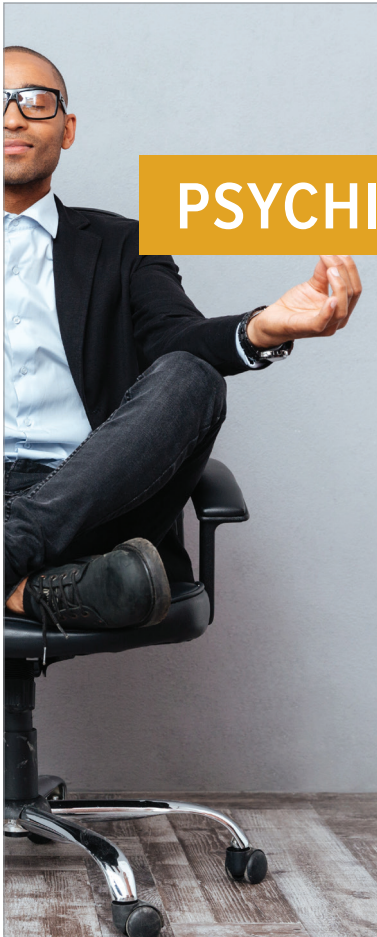

## FIND YOUR CAREER BALANCE IN CALIFORNIA

### PSYCHIATRISTS

**\$244,128 - \$293,340**  
annual salary (Board Certified)

**\$237,864 - \$285,072**  
annual salary (Board Eligible)

California Correctional Health Care Services is seeking proactive, knowledgeable psychiatrists with an interest in correctional and/or forensic psychiatry to join our multidisciplinary teams. Within the California Department of Corrections and Rehabilitation's facilities, you will find like-minded professionals well-versed in the intricate psychiatric and medical interplay necessary to treat our diverse patient population. Here, you will see and develop treatment plans for cases you won't encounter in any other practice. And with our strong Positive Behavioral Support Team's assistance, you'll be able to devote your time to practicing and honing advanced psychopharmacological skills. Plus, with 35 locations throughout California, you're sure to find your perfect fit.

In return for your efforts, we offer:

- 40-hour workweek with flexible schedules
- Generous paid time off and holiday schedule
- State of California pension that vests in five years
- 401(k) and 457(b) options – tax defer up to \$35,000 per year
- Paid insurance, license, and DEA renewal
- Visa sponsorship opportunities
- Paid CME with paid time off to attend
- \$10,000 Thank You Bonus to professionals newly hired with the State of California

Take the first step in joining one of our teams and contact **LaTreese Phillips** at **916-691-4818** or **LaTreese.Phillips@cdcr.ca.gov**. You may also apply online at **www.ChangingPrisonHealthCare.org**.

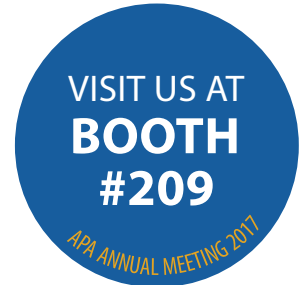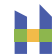

CALIFORNIA CORRECTIONAL  
HEALTH CARE SERVICES

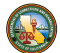

EOE

AMERICAN  
PSYCHIATRIC  
ASSOCIATION  
**ANNUAL MEETING**  
May 20-24, 2017 • San Diego

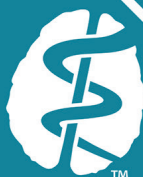

Psychiatric  
Services

### Creating Your Voice: A Guide to Publishing in *Psychiatric Services* (Workshop)

Although a 20% acceptance rate may seem daunting, *PS* and other journals offer a range of article types, each with different demands and review criteria. What's your best fit? Whether you are a researcher or clinician, come to this workshop and find out how to increase your success in publishing.

- Understand the requirements for research articles
- Get acquainted with *PS* columns, Frontline Reports, and outlets for commentaries
- Learn what to expect in the review process and how to interpret and respond to decision letters
- Find out how to adapt and present your ideas within different formats
- Discuss publication ideas with a *PS* board member and outline steps to prepare material for publication
- Meet the *PS* Editor, Lisa B. Dixon, M.D., M.P.H., and her *PS* colleagues: Roberto Lewis-Fernandez, M.D., Regina Bussing, M.D., M.S.H.S., Sheryl Kataoka, M.D., Marcia Valenstein, M.D., M.S.

**Saturday, May 20, 2017 • 1:30–3:00 p.m. • Room 24C, San Diego Convention Center**

# The DSM-5 Collection

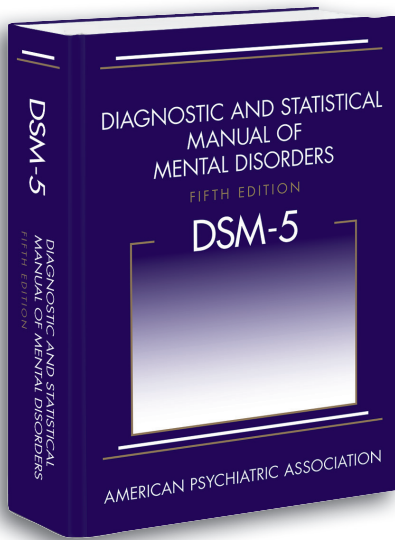

## Diagnostic and Statistical Manual of Mental Disorders, Fifth Edition (DSM-5®)

American Psychiatric Association

This new edition of *Diagnostic and Statistical Manual of Mental Disorders* (DSM-5®), used by clinicians and researchers to diagnose and classify mental disorders, is the product of more than 10 years of effort by hundreds of international experts in all aspects of mental health. Their dedication and hard work have yielded an authoritative volume that defines and classifies mental disorders in order to improve diagnosis, treatment, and research.

The criteria are concise and explicit, intended to facilitate an objective assessment of symptom presentations in a variety of clinical settings—inpatient, outpatient, partial hospital, consultation-liaison, clinical, private practice, and primary care.

- The latest findings in neuroimaging and genetics have been integrated into each disorder along with gender and cultural considerations.
- The revised organizational structure recognizes symptoms that span multiple diagnostic categories, providing new clinical insights in diagnosis.

- Both ICD-9-CM and ICD-10-CM codes are included for each disorder.

The *Diagnostic and Statistical Manual of Mental Disorders*, Fifth Edition, is the most comprehensive, current, and critical resource for clinical practice available to today's mental health professionals.

2013 • 991 pages • ISBN 978-0-89042-554-1 • Hardcover • \$210.00 • Item #2554

2013 • 991 pages • ISBN 978-0-89042-555-8 • Paperback • \$160.00 • Item #2555

2013 • 991 pages • ISBN 978-0-89042-557-2 • eBook • \$128.00 • Item #2557

**DSM-5**  
COLLECTION

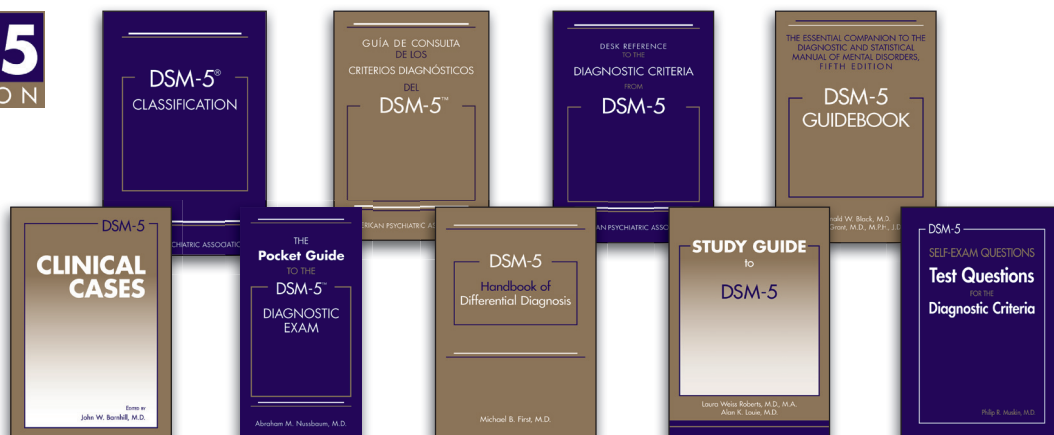

AMERICAN  
PSYCHIATRIC  
ASSOCIATION  
PUBLISHING

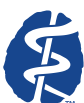

Order Online: [www.appi.org](http://www.appi.org)  
Phone: 703-907-7322  
Toll Free: 1-800-368-5777  
Email: [appi@psych.org](mailto:appi@psych.org)

20% Discount for American Psychiatric  
Association Members

25% Discount for APA Resident-Fellow Members AH1706A
