# Psychiatric Services

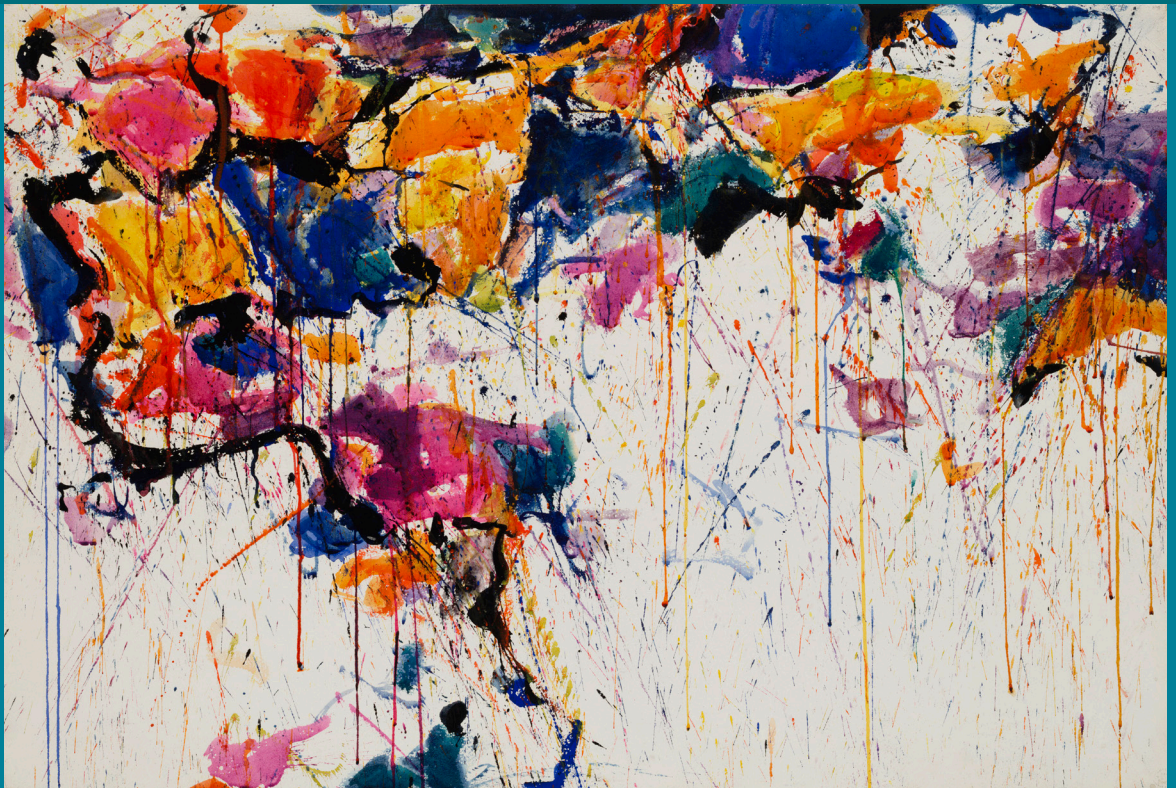

MHPAEA success in dropping behavioral health treatment limits  
Antidepressant prescribing to older adults without major depression  
Lack of HIV testing for Medicaid patients with severe mental illness  
A research agenda for rising social inequalities in rural America
