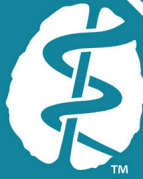

### Essential Information!

#### Presidential Symposium on Measurement-Based Care

Measurement-based care (MBC) involves the systematic use of symptom rating scales to drive clinical decisions for patient care. This sounds simple, but not all stakeholders agree on the value of MBC, despite clear evidence of its effectiveness. Lisa B. Dixon, M.D., M.P.H., and her panelists will use the recently published *Psychiatric Services* article, "A Tipping Point for Measurement-Based Care," by Fortney and colleagues, to launch a discussion of the fundamentals of MBC and how it can be used as an element of usual care, including

- the research base for MBC, including several large-scale pragmatic trials and clinical demonstration projects
- brief structured symptom rating scales with strong psychometric properties
- examples of implementation of MBC and clinical impact on outcomes
- pitfalls (one-time screening, infrequent symptom assessment, etc.)
- policy implications

**Panelists:** John C. Fortney, Ph.D. (coauthor), Jürgen Unützer, M.D., M.P.H. (coauthor), Lori Raney, M.D., Mark Williams, M.D.

**Wednesday, May 24, 2017 • 2–5 p.m. • Room 24C, San Diego Convention Center**



"I like the diversity that you find when working at DMH, both with the patients and your co-workers. I really enjoy working in community mental health and helping those who have nowhere else to turn."

**Alisa Sabshin, M.D.**  
Mental Health Psychiatrist

Come see us at the  
**APA Annual Meeting**  
May 20-24, 2017 - San Diego  
**Booth #418**

Los Angeles County has immediate openings with Antelope Valley, Correctional Health Services, Juvenile Halls and Probation Camps, and directly operated programs. This is your chance to join one of the nation's leading mental health agencies and work in a safe, diverse, and challenging environment. The County is filled with opportunities for professional development and growth, including new full-time and part-time psychiatrist positions.



[www.psychiatristjobs.la](http://www.psychiatristjobs.la)

- ✓ Competitive starting salaries and benefits
- ✓ Potential Bonuses up to \$30,000\* a year
- ✓ Up to 24 hours/wk for outside employment

\*Depending on qualifications and placement.



"I picked DMH because it gave me the opportunity to work with a wide variety of patient populations and overall makes my career very fulfilling. It's a great place to continue to learn, with a very nurturing environment. Come join us!"

**Carlos Contreras, M.D.**  
Mental Health Psychiatrist

**Psychiatric Services** (ISSN |1075-2730; online version, 1557-9700) is published monthly by the American Psychiatric Association, editorial and executive office, 1000 Wilson Blvd., Suite 1825, Arlington, VA 22209-3901. Copyright © 2016 by the American Psychiatric Association. Printed in U.S.A. Periodicals postage paid at Arlington, VA, and at additional mailing offices. **POSTMASTER: Send address changes to *Psychiatric Services*, 1000 Wilson Blvd., Suite 1825, Arlington, VA 22209-3901.**
